1 **Barriers to climate change and health research in India: A qualitative**  
2 **study**

3

4 Shreya S Shrikhande\*<sup>1,2</sup>, Sonja Merten <sup>1,2</sup>, Olga Cambaco<sup>1,2</sup>, Tristan Lee <sup>1,2</sup>, Ravivarman  
5 Lakshmanasamy <sup>3</sup>, Martin Rösli <sup>1,2</sup>, Mohammad Aqiel Dalvie <sup>4</sup>, Jürg Utzinger <sup>1,2</sup>, Guéladio  
6 Cissé <sup>1,2</sup>

7

8 <sup>1</sup> Swiss Tropical and Public Health Institute, Allschwil, Switzerland

9 <sup>2</sup> University of Basel, Basel, Switzerland

10 <sup>3</sup> State Surveillance Officer, Department of Health and Family Welfare Services, Govt. of  
11 Puducherry, Puducherry, India

12 <sup>4</sup> Centre for Environmental and Occupational Health Research, School of Public Health and  
13 Family Medicine, University of Cape Town, Cape Town, South Africa

14

15 \* Corresponding author: Shreya Shrikhande, Swiss Tropical and Public Health Institute,  
16 Kreuzstrasse 2, CH-4123 Allschwil, Switzerland. Email: [shreya.shrikhande@swisstph.ch](mailto:shreya.shrikhande@swisstph.ch)

17 Word count: 6684

18 Keywords: Climate change; health; research barriers; environmental health; qualitative  
19 study; stakeholder perspectives; India; LMIC

20

21

22

23

24

25

26

27

28

29

30

31

32

33

34

## 35 Abstract

36 Almost a quarter of the global burden of disease and mortalities is attributable to  
37 environmental causes, the magnitude of which is projected to increase in the near future.  
38 Evidence informed policies and interventions are a key element in the adaptation response  
39 for countries. However, in many low- and middle-income settings, there remains a large gap  
40 in the synthesis of evidence on climate-sensitive health outcomes. In India, now the world's  
41 most populous country, little remains known about the impacts of climate change on  
42 various health outcomes. In light of India's vulnerability to climate change, the growing  
43 population and the high burden of disease, it is imperative for public health professionals to  
44 engage in the climate action, and to understand the challenges they face, particularly with  
45 regard to barriers in conducting environmental health research. In this study, we employed  
46 key informant interviews to understand the perceived research barriers amongst health  
47 professionals, including medical researchers, and professionals involved in environmental  
48 policies and planning in Puducherry, India. The findings were analysed using data driven  
49 qualitative thematic analysis to elaborate the major perceived barriers to conducting  
50 environmental health research. Challenges in data collection systems and accessing data  
51 was the major barrier along with the need for strengthening technical and methodological  
52 research capacity. Participants described working in the backdrop of insufficient  
53 prioritization and knowledge on the wide range of impacts of climate change on health,  
54 both in the policy context and amongst scientists, which was also perceived to be a  
55 challenge in conducting environmental health research. Finally, limited resources to conduct  
56 research and the tendency to focus on conventional climate related health outcomes were  
57 also seen as challenges to advancing research on this topic. In the context of the paucity of  
58 data on environmental health from India, despite recognised climate change related health  
59 vulnerabilities, these findings could contribute to the development and improvement of  
60 relevant interventions conducive to a strong research environment.

61

## 62 Key message:

### 63 **What is already known on this topic?**

64 Climate change has been linked to a range of adverse health outcomes globally. There is a  
65 growing body of research studying the associations between climate variables and various  
66 health outcomes. However, it remains poorly studied in India, which has a high vulnerability  
67 to climate impacts. It is important to understand what public health professionals perceive  
68 as barriers on the matter and their needs in order to better elucidate the health risks of  
69 climate change and improve the public health response to adapt to them.

### 70 **What this study adds?**

71 We identify three key barriers faced by public health professionals as key stakeholders,  
72 namely: (i) political and institutional barriers;(ii) education and awareness barriers; and (iii)  
73 technical research barriers. We show there is a need, from the professionals perspective, to  
74 improve community and political awareness on climate change and health; improve

75 technical research capacity and collaboration amongst researchers; and improve health  
76 surveillance and access to health data for research.

### 77 **How this study might affect research, practice or policy**

78 This study identifies crucial challenges faced in conducting environmental health research by  
79 public health professionals. Therefore, the findings can be used to further elaborate and  
80 address these challenges, in order to further motivate the professionals, strengthen the  
81 environmental health research capacity and improve understanding of health vulnerabilities  
82 and risks attributed to climate change in India.

83

## 84 **INTRODUCTION**

85 An ever-growing body of research has irrefutably shown the global health impacts of climate  
86 change through both direct and indirect exposure pathways [1, 2]. Multiple risk and  
87 vulnerability factors determine the population resilience and adaptive capacity, from socio-  
88 political, demographic and biological factors to infrastructure, urban planning, health  
89 information systems and health workforce [2, 3]. Given the regional variations in climate  
90 systems, the health impacts of climate change differ between and within countries and  
91 communities, mediated by interconnected socio-economic and environmental determinants  
92 of health [4, 5]. Non-communicable diseases (NCDs), such as respiratory diseases,  
93 cardiovascular diseases (CVDs), mental health conditions, have been recognized as growing  
94 climate-sensitive health outcomes, in addition to other communicable diseases like vector-  
95 and water-borne diseases and malnutrition [3, 6].

96 With the rapid pace of climate change, the health impacts attributable to it are also  
97 projected to increase [7]. Strengthening the adaptive capacity of countries is therefore an  
98 essential component of the climate change response [8]. Timely public health interventions  
99 can do much to protect population health from the potential adverse health impacts of  
100 climate change [9]. Low- and middle-income countries (LMICs), such as India, remain  
101 disproportionately affected by climate impacts, with a critical need to strengthen the  
102 healthcare response to climate impacts [10, 11]. One of the key steps in the regional or local  
103 adaptation response is assessing the true burden of the health impacts within the  
104 population of that location [12]. However, owing to the complexity of the relationship  
105 between climate change and health, identifying and estimating this association remains one  
106 of the biggest global and environmental health challenges, especially in LMICs [11].

107 In India, the existing health and social disparities within the population make it one of the  
108 most vulnerable to climate change impacts, compounded by climatic diversity [13-16]. There  
109 have been recent efforts from the Government of India to focus on climate change and  
110 health, as evinced by the recent addition of a health mission to the National Action Plan on  
111 Climate Change (NAPCC). This led to the formulation of the National Action Plan on Climate  
112 Change and Human Health (NAPCCHH) and the drive for State Action Plans for Climate  
113 Change and Human Health (SAPCCHH) [17, 18]. While the government recognizes in those  
114 official document several diseases as climate-sensitive, public health engagement, action

115 and research on health impacts of climate change have been curiously limited in India,  
116 especially in light of the magnitude of climate impacts to which it is vulnerable [19, 20].

117 Medical and public health professionals play an important role in researching, managing and  
118 responding to climate change impacts on health. Along with being considered credible  
119 sources of information, these groups of professionals also have the capacity for scientific  
120 inquiries into the climate change attributable impacts of health [21-24]. Globally, there is an  
121 acknowledged need to train the health workforce to engage on, study and manage health  
122 impacts of climate change. As there are currently gaps in this domain, it is therefore  
123 particularly important to understand how this group perceive the needs and the barriers for  
124 their appropriate level of engagement and action any perceived research needs and barriers  
125 identified by this group [25, 26].

126 The aim of this study is to understand some of the contextual barriers to environmental  
127 health action-research amongst two relevant professional groups in Puducherry, India. We  
128 focused our study on: (i) medical professionals, both in active research and practicing; and  
129 (ii) members of the Department of Science, Technology and Environment working on  
130 climate change in Puducherry. As this study is a part of a larger project on CVDs and climate  
131 change in India, we also highlighted the CVD specific challenges and barriers to conducting  
132 research. As the focus of our paper is to understand challenges, research enablers have not  
133 been highlighted.

## 134 **METHODS**

### 135 **Study setting**

136 This study employed key informant interviews following a semi-structured interview guide.  
137 The methods have been described in detail elsewhere [27]. Briefly, the focus of our study  
138 was Puducherry district, which lies on the south-eastern coast of India, with a population of  
139 950,289, as per the Government of India 2011 Census [28]. Puducherry has one main State  
140 government run tertiary care hospital and medical college, several private clinics and  
141 primary care health centres. It is also home to the Central Government Jawaharlal Institute  
142 of Postgraduate Medical Education and Research (JIPMER), an 'Institute of National  
143 Importance' and tertiary care referral hospital. Within the Department of Science,  
144 Technology and Environment (DSTE), there also exists a specialized Puducherry Climate  
145 Change Cell with the aim to integrate knowledge about climate change and facilitate the  
146 NAPCC implementation, including the state specific Action Plan [29].

### 147 **Data collection and analysis**

148 A total of sixteen semi-structured interviews were conducted between January 2022 and  
149 March 2022 in Puducherry and virtually over Zoom for two participants. Using purposive  
150 sampling based on prior connections followed by snowball sampling, we invited medical  
151 professionals (research or practicing) and DSTE staff working on the Puducherry State Action  
152 Plan for Climate Change (hereon referred to as environmentalists). Interviews continued  
153 until information saturation was reached in the interviews or we had interviewed all the

154 relevant target participants, as in the case of the DSTE staff. Practicalities such as participant  
155 schedules and ongoing COVID-19 restrictions also influenced our informant recruitment.

156 There was an equal balance between research-engaged professionals from the medical and  
157 environmental field combined and practicing doctors. Eleven of the participants had a  
158 medical background and were actively engaged as practicing doctors or researchers. Within  
159 the doctors, we mainly targeted cardiologists, emergency medicine or general medicine  
160 physicians who were involved in areas relevant to our study. The majority of the participants  
161 was male, with only three females, out of which only one had a medical background. The  
162 participant profile is presented in the Supplementary material Table S3 and further  
163 described in [27].

164 The interviews lasted between 15 to 50 minutes and were audio recorded with informed  
165 consent using a simple voice recorder and field notes were taken to optimize the interview  
166 guide and note key topics to minimize bias. We used an *a priori* developed interview guide  
167 with broad and open-ended questions to allow participants to freely bring up and discuss  
168 relevant topics. All interview recordings were assigned a number prior to transcription to  
169 ensure anonymity throughout the analysis process. Verbatim transcription and analysis was  
170 done using the MaxQDA software by S.S.

171 For the analysis, we followed a combination of deductive and inductive thematic analysis  
172 was used as described by Gale et al [30]. Broad themes were developed based on the aim,  
173 framework and interview guide. During analysis, major themes were inductively developed  
174 for emerging topics, which we then clearly defined. After familiarization with the transcripts,  
175 an initial codebook was developed from coding the three interviews with the richest data;  
176 the remaining interviews were indexed and coded further. The codes were classified into  
177 categories, sub-themes and themes. The final analytical matrix included three themes. S.S.  
178 and T.L. independently validated the codebook and agreed on the final framework matrix  
179 that considered all relevant codes. The matrix was then used to chart relevant quotes  
180 supporting our findings and draw comparisons between participants.

181 The conceptual framework for climate change risk perceptions developed by van Eck *et al*  
182 [31] and the framework for health inequalities proposed by Rudolph *et al* [32] were used as  
183 a base for our analytical framework, shown in Figure 1. While there are three major themes,  
184 this paper focuses only on the theme of 'Institutional determinants'. The findings from the  
185 two other themes have been elaborated elsewhere. Within the context of this paper,  
186 'institution' is used as a broad term covering all governmental structures including policy,  
187 education, and occupation. We identify how these determinants can be perceived as  
188 barriers to environmental health research.

### 189 Ethical consideration

190 There was no prior relationship between the researcher and participant. Before the  
191 interview, the researcher went over the informed consent form, which was then signed by  
192 both parties. The participants were aware of their right to withdraw from the study at any

193 time, and they were provided the contact details of all the researchers involved in the  
194 project. All interviews were carried out by S.S with R.L being present as a passive observer  
195 for three interviews. Additionally, all the quotes presented in this analysis have been  
196 assigned only by serial number to ensure anonymity.

197 This study was approved by the Institute Ethics Committee (Human Studies) of the Indira  
198 Gandhi Medical College and Research Institute (A Govt. of Puducherry Institution); No.  
199 318/IEC-31/IGM&RI/PP/2021 and by the Ethics Committee Northwest and Central  
200 Switzerland (EKNZ); Statement ID- AO\_2020\_00034. The methodology used in this project  
201 abided by the principles laid out in the Declaration of Helsinki and the COREQ checklist.

## 202 Patient and public involvement

203 As we employed a combination of purposive and snowball sampling, some participants were  
204 involved in helping us identify suitable participants to interview. Beyond that, no members  
205 of the public were involved in the design, conduct, reporting or dissemination plan of our  
206 research.

207

## 208 RESULTS

209 We first lay out the knowledge participants had regarding the institutional framework,  
210 including policies, for climate change and health followed by perceived institutional barriers  
211 to research, namely political, educational and technical barriers. As this study is part of a  
212 larger study examining climate change impacts on CVDs, we also chose to highlight CVD  
213 specific barriers.

### 214 Institutional determinants: knowledge and perceptions

#### 215 *Limited knowledge and awareness on climate change and health related policies*

216 We found limited awareness among the participants about climate change and health  
217 related policies, such as the NAPCC, NAPCCHH and SAPCCHH. Aside from the  
218 environmentalists, who worked on it, only three medical professionals who worked on one  
219 of the Action Plans were aware of it. Four participants expressed belief about the non-  
220 inclusion of climate change in disease specific policies and the lack of integrated climate  
221 change and health policies and guidelines.

222 *“Our country has different policy, environmental policy, health policy. But I have doubt*  
223 *whether health policy has any component of climate change. So, it needs to be incorporated*  
224 *in a health policy of national importance as well as the state, but currently, this element is*  
225 *not in place, that is my feeling.” #8, Environmentalist*

226 One of the environmentalist also mentioned challenges faced by the government in  
227 integrating climate change in development plans. The emphasis on socio-economic  
228 development was made apparent, which was countered by ongoing efforts to include  
229 climate change adaptation as co-benefits of development.

230 *“The challenge is that the government sectoral officers are not aware of how the climate*  
231 *adaptations need to be integrated into their developmental plans. Because they, whenever*

232 *they plan for a project, they plan it from the socio economic development perspective.” #7,*  
233 Environmentalist

234 Health system vulnerabilities due to climate change in Puducherry were considered a  
235 growing challenge and highlighted by multiple doctors. Most participants expressed limited  
236 knowledge about climate change and health and agreed on the importance of education as  
237 the first step to increase awareness and research capacity. Several participants, especially in  
238 those working in hospitals, displayed support to reform existing guidelines to reflect health  
239 risks from climate change, conditional to more contextual research to inform these changes.

240 *“This climate and health is a very good topic. To be frank, we don't have much knowledge*  
241 *about climate and health. ... After knowing all these things, after getting an idea what to*  
242 *happen, we should have a plan, national policy or something, we should make a national*  
243 *policy so that the government can do whatever needed during the season. So I think this will*  
244 *be the first step.” #13, Practicing physician*

245 In addition, we found varying knowledge among participants about the health impacts of  
246 climate change. Vector borne diseases were most commonly associated with climate-  
247 sensitivity while other diseases like NCDs or CVDs were perceived to be primarily lifestyle  
248 related. When it came to research, very few participants mentioned having been part of  
249 environmental health studies or knowing about current research. The need for regional  
250 research for knowledge synthesis on health risks from climate change was expressed  
251 throughout the interviews.

## 252 Political and institutional barriers

### 253 *Disengaged leadership and low political prioritization of climate change and health*

254 Political leadership that did not consider health impacts of climate change as a pressing  
255 matter was perceived as one of the barriers to conducting research on the topic. Rather  
256 than viewed as a cause for immediate concern, several participants mentioned how climate  
257 change was rather seen as future concern by policy makers as well as the general public.  
258 Given the perceived little awareness on health impacts, a few participants also mentioned  
259 the slim likelihood of decision makers actually being aware of it. One participant described  
260 the issue as being *“not mainstream enough”* to warrant focused work, contributing to the  
261 perceived low priority assigned to environmental health research.

262 Many participants felt that the governmental focus was inclined towards non-health  
263 impacts of climate change. The most pressing climate change impacts, which also influence  
264 research focus, were thought to be pollution, coastal sensitivity and natural resource  
265 depletion and degradation, especially in the context of Puducherry as a coastal region.  
266 Additionally, existing sectoral programs already running were seen as a hindrance to  
267 focusing on climate change related programs by one participant.

268 *“The problem is everybody has to understand at the level of the minister or the secretaries.*  
269 *They have to come forward...because so many programs are there. Not only about climate*  
270 *change, other programs are there so they do not focus much on (climate change) programs...*

271 *Actually, what I have seen for the past 2-3 years, they don't care much about climate.”#1,*  
272 Practicing physician/policy advisor

273 The challenges India faces from other vulnerabilities were perceived to outrank climate risks  
274 to health, including unmet nutritional and economic needs. Despite climate change being  
275 recognized as a health risk factor, there was a clear disconnect between on-paper  
276 government plans and practice when it came to environmental health research.

277 *“I'm an adviser to government of India on health related research. But we did discuss a lot of*  
278 *things but we did also touch upon climate-effects of climate on health...That was considered*  
279 *as an important topic, but we didn't dwell much upon how to take it forward because there*  
280 *are more pressing problems.” #15, Practicing physician/academic*

281 *Weak inter-departmental integration and co-ordination for climate change and health*

282 The compartmentalization of topics within institutes or sectors was seen as a barrier to  
283 conducting inter-disciplinary research by the participants. One participant discussed the  
284 newly formed Puducherry Climate Change and Health Action Plan (2022), with the aim to  
285 bring together a multi- sectoral team under the leadership of the health ministry, to focus  
286 on health impacts of climate change.

287 However, apart from one participant, most others voiced a perceived need for an  
288 independent, coordinating body focused on environmental health, incorporating a research  
289 agenda. Partially, this was due to climate change being thought of an added responsibility  
290 for health professionals and vice versa for environmentalists, especially for those working in  
291 the government. As highlighted by a few participants, officials were likely to prioritize their  
292 primary work profile over the added responsibility of climate change and health research.

293 *“Especially government departments, they are loaded with a lot of work. Today, an officer*  
294 *comes in, he has to do his own work, not the work that other departments asks us to do...”*  
295 #9, Environmentalist

296

297 Several participants mentioned the Puducherry Climate Change cell created in response to  
298 address climate change impacts. However, despite that, one medical researcher mentioned  
299 the current difficulties in identifying the focal point of contact for climate change and  
300 health. Another concern in the existing scenario was inter-sectoral, collaborative research  
301 being dependant on higher officials being receptive to their employees researching a topic  
302 not entirely within the scope of their respective department. This was also viewed from the  
303 sense of improving coordination between the sectors, with a dedicated head of climate  
304 change and health, supported by relevant sectorial bodies.

305 *“Intersectoral body and there should be one decision maker. So now, everybody is like they*  
306 *are the leader in the particular sector, but if they need the support from other one, that*  
307 *coordination may be lacking...There won't be any one dedicated person for the climate*  
308 *change. So they will be in charge of multiple departments. For example, somebody's going to*



309 *be in charge of immunization or the child health. So the priority will be child health*  
310 *obviously.” #3, Medical doctor/academic*

311 Educational and informational barriers

312 *Gaps in climate change and health in higher education curricula*

313 One of the strongest emergent themes was the need for environmental health education,  
314 either by incorporating climate change in the health curriculum or health impacts of climate  
315 change in the environmental curriculum in universities and schools. The prevalent feeling  
316 was the source of climate change and health literacy needs to be from multiple sources,  
317 with formal education being the most important one. Most participants also felt that at  
318 present there was a disconnect between environmental and health education, as a result of  
319 which there was a relatively low level of awareness on climate change impacts on health.

320 *“Education system need to be addressed from beginning...Even the medical college students*  
321 *who are completing five years courses, I do not see any syllabus which contains impact on*  
322 *health by the climate change even though it is very important...my son is studying medical-*  
323 *medicine, but I guess I just go through the syllabus, but nothing is there.” #8,*  
324 *Environmentalist*

325 All the environmentalists professed to never having specifically studied health impacts of  
326 climate change during the course of their education. On the other hand, the health  
327 professionals expressed incongruent views on climate change-health education. While one  
328 said:

329 *“Climate sensitive diseases, this is a part of the curriculum, we are seeing lot of diseases. And*  
330 *the epidemiology portion they will tell this is exacerbated during this season, this is*  
331 *exacerbated during this climate. That will be there in our curriculum.” #12, Practicing*  
332 *physician*

333 Another said,

334 *“No. So diseases we have been trained, but we have not been taught that this is so much*  
335 *related to the climate change. Once we completed our MBBS or MD, or during your MD we*  
336 *may have read it, but as a separate training or as a separate chapter, 'these are the climate*  
337 *sensitive diseases' or separate training for a week or a module, that is not part of the core*  
338 *curriculum.” #3, Medical doctor/academic*

339 Continuing education courses specific for health impacts of climate change were suggested  
340 by a few participants as potential options to bridge the gap between the environment and  
341 health. Two participants also suggested including short courses on this topic for all people  
342 working on topics related to climate change, health, adaptation and resilience.

343 *Weakness in inter-sectoral information dissemination*

344 Many of the participants mentioned having little to no awareness on climate change-health  
345 related research unless actively searching for it, pointing to the scope for improving related

346 education and science dissemination, especially among the scientific community. Some  
347 participants were also of the opinion that awareness on health impacts of climate change in  
348 general was lacking, especially among medical professionals. Environmental risk factors  
349 were not commonly associated with health inherently, partially attributed the low scientific  
350 exposure on the topic.

351

352 *“And among doctors itself, there is not much awareness actually. How it's going to affect,*  
353 *because now people are only focusing on environment change and other things actually.*  
354 *How we decide an impact on health, we use a lot of data. (Data) has to be there, it needs to*  
355 *be published.” #6, Practicing physician*

356

357 CVDs were seen as a ‘silent’ disease, with many people are not trained to look for  
358 symptoms, much less correlate them to weather conditions, all suggesting the need for  
359 improved CVD literacy and awareness on the topic. On the other hand, many participants  
360 were open to changing their current schools of thought on risk factors for health to include  
361 climate change, conditional to being informed by global research on the topic.

362

363 *“If the research or it's already proven in other countries, 'so this is a risk factor it is a good*  
364 *idea to add' but [before adding anything], I think some data or there should be some routine*  
365 *surveillance or monitoring system should be there. ... even within the medical circle, people*  
366 *may not be aware like how much is the contribution of this, the climate change to the heart*  
367 *disease or for any disease for that case... I don't think our administrators or even our*  
368 *clinicians are that much thinking about the impact of climate change, and this one.” #3,*

369

370 *Scepticism and low awareness on non-conventional health impacts of climate change*

371

372 As alluded to previously, health impacts of climate change are often not explicit, making it a  
373 challenge to research or focus the research agenda on for several reasons. One participant  
374 described how the slow pace of climate impacts leads people to think it will not immediately  
375 affect health, unless the impacts are drastic.

376

377 *“...The problem has to become so severe, like you have air pollution in Delhi, then people will*  
378 *act. So this climate change affects the life slowly it's not a drastic...that is one of the reasons*  
379 *I feel. And slowly if you get some data and keep on generating awareness not only among*  
380 *the public, but also within the scientific community, then slowly things will be better.”#3,*

381

382 Medical doctor/academic

383

384 For researchers, an additional challenge of convincing funders or collaborators on the health  
385 impacts of climate change also emerged. One participant described the difficulty  
386 researchers had separating environmental risks from other common health risk factors.  
387 Scepticism when attempting to research health impacts of climate change was also  
388 encountered. Confounding from other risk factors and potential ecological bias was seen as  
389 the roots of this uncertainty.

387 *"Maybe for six, seven years, I have been trying to do some work on climate change and*  
388 *environmental health. Every time I write a proposal I'm criticized largely telling that "how is*  
389 *it going to work?... And one other problem I see with the research with climate change or*  
390 *any environmental thing, it's ecological effects. So people ask "how can you attribute this to*  
391 *only this, why not to this?", " Why not to lifestyle, why only to climate change?" So this direct*  
392 *relationship is not there."* #4, Medical doctor/ academic

393 Diseases such as malaria, with historical links to stagnant water as breeding grounds, have  
394 been etched into public knowledge and further perpetrated through mass awareness  
395 campaigns, intervention programs and research. The slow developing nature of CVDs and  
396 the prevalent categorization of CVDs as solely lifestyle diseases was mentioned by many  
397 participants as potential barriers to research. The multifactorial nature of CVDs was thought  
398 to add to the difficulty of identifying climate attributable impacts, with most of the focus  
399 being on evident lifestyle contributions.

400

401 *"Non-communicable diseases, because we are not quantifying that and because of the long*  
402 *latent period of the incident, you're not able to quantify directly to environment or climate*  
403 *change. So definitely, hypertension, cardiovascular disease, all these probably diabetes also*  
404 *because of the changing food pattern, but I don't think -you cannot separate climate change*  
405 *from any of the health effects or any of the non-communicable diseases. Also related to*  
406 *stress caused by climate change."* #2, Medical doctor/ academic

407

408 Another participant described how clinicians especially do not see the need to focus on  
409 environmental risk factors for CVDs, believing it ineffective in reducing the overall burden.  
410 One participant described how CVDs are commonly reduced to lifestyle diseases with the  
411 onus of risk management on the individual rather than a *"willingness to see the invisible*  
412 *factors"*. A few participants expressed belief and hope that the temperature-CVD  
413 association was an upcoming topic of interest for the government and public both.

414

415 *"I'm just giving my opinion. See, this heart attack and cardiovascular diseases, whatever is a*  
416 *well-known thing, even a common person knows that, but this climate change aspect of it,*  
417 *even the officials or the administrators wouldn't know because-so, there comes the gap...So,*  
418 *maybe in another five years, people would really relate these two."* #9, Environmentalist

419 The need for regional studies was also stressed upon as there seemed likely to be a  
420 disconnect in comparing national or global level problems with health impacts of climate  
421 change on a local level. Participants described the attitude of *"this does not affect us"*  
422 among the public when it came to climate change especially.

423

424 Technical barriers to research

425 *Insufficient resources and workforce dedicated to research*

426 Resource allocation, especially financial, for climate change-health research was described  
427 as a barrier. Along with inconsistent funding from the government, one of the problems  
428 mentioned was lack of adequate trained personnel. This was partially linked to the need to  
429 relieve the research expectations from already over-burdened doctors. There was also a  
430 need to have trained personnel for digitalization and categorization of health data in order  
431 to create a digital state-level health database.

432 *“The UT of Puducherry, we do not have much data. So we need to focus and we need*  
433 *manpower. We do not have the funding also it’s a problem now. Sometimes they provide*  
434 *funds; sometimes they do not give that adequate funds.” #1, Practicing physician/policy*  
435 *advisor*

436 Some participants, referred to the low percentage of the annual budget of India allocated to  
437 health along with the need to increase this. One participant described funds earmarked for  
438 climate change-health research institutionally, along with optimism that this would lead to  
439 future research opportunities.

440 *“Yes, for recent years even ICMR (Indian Council of Medical Research) has called for*  
441 *proposals on this environment related, uh, this one. ICMR is one of the largest body which is*  
442 *for the research organization as well as for the academic institutes like us. So, clearly, they*  
443 *are given a separate block of funding for climate change and this one. That means the funds*  
444 *are available.”#3, Medical doctor/academic*

445 However, this was countered by the notion that most of the funds are directed to Central  
446 government institutes as opposed to smaller research institutes. A participant also alluded  
447 to misappropriation of research funding at an institutional level. Another participant spoke  
448 about the need to involve university students in research along with concern that most  
449 students do not get access to funding or research opportunities. There was a feeling that  
450 most students remain unaware of opportunities for funding or that funds do not ultimately  
451 reach the students aiming to conduct research. Another participant also described the  
452 prioritization of more immediate health burdens and curative research as opposed to  
453 preventative research for the directing of funds or resources. This was supported by the  
454 opinion expressed by an environmentalist on climate change being viewed as a problem for  
455 the future as opposed to the present.

456 *“So though we focus on vaccination and other things, but still, the budget still flows more for*  
457 *the curative aspects rather than the preventive part. So for instance, the climate change is*  
458 *more of like, you prevent this- the future heart attacks or some other diseases. You have to*  
459 *focus on the prevention.” #3, Medical doctor/academic*

460 *Underdeveloped transdisciplinary research capacity*

461 Alongside education, the need to build more technical capacity among researchers was also  
462 mentioned as one of the biggest challenges by participants. Despite a potential interest and  
463 willingness from researchers, the lack of training and expertise in climate change-health  
464 research was strongly expressed. This was tied in with the expressed desire for mentorship,  
465 both to facilitate increased awareness among the scientific and medical community as well  
466 as increased regional research on health impacts of climate change.

467 *“Yeah, more than research, I would tell it as people are aware and willing to do it, but here is*  
468 *more of capacity building...Let's say if I want to work on vector borne disease, I know who to*  
469 *approach...but when it comes to climate change, that linking is absent. ...So actually, even if*  
470 *I'm interested and I want to work on it, there are a lot of hurdles which has to be crossed...So*  
471 *I have to be given an opportunity to work on it, or I feel somebody has to mentor me to work*  
472 *on it. So what we call as, starting trouble, you know is there. Once I think somebody starts,*  
473 *we will be going into it...” #4, Medical doctor/ academic*

474 Some participants had the belief that larger research institutes or relevant ministries could  
475 be drafted to provide training to the smaller educational institutes or local government  
476 bodies. There was a sense of “duty” attached to studying all aspects of climate change  
477 impacts for the environmentalists in Puducherry tied in with a search for a starting point.

478 *Research slowed by unavailability and limited access to quality data*

479 Participants described critical gaps in monitoring, surveillance and database development,  
480 all of which were perceived to hamper research conduction, especially for health data. First,  
481 merging health data from the many healthcare facilities within Puducherry was seen as a  
482 challenge. There was an expressed need to bring together health data for the entire UT in a  
483 single system, including public and private healthcare facilities.

484 *“Puducherry as so many medical colleges, but all of them do not supply data to the*  
485 *government. They may have their own data. That's the problem: actually we have to*  
486 *integrate everyone” #1, Practicing physician/policy advisor*

487 Second, some participants mentioned the state-level government health-monitoring  
488 database. However, participants described this as being limited to selected diseases from all  
489 the government run primary healthcare centres, with limited information on the private  
490 sector or secondary and tertiary care hospitals. A few participants described the lack of  
491 disease-specific categorization of health outcomes, making it an added challenge in  
492 conducting health related research.

493

494 *“Cases are reported but not categorized into these sectors...And as you said, this co- morbid*  
495 *or cardiovascular, those kind of things we do not have any data... They have a very*  
496 *comprehensive data. They put all the data together, (but) they don't categorize it. Maybe*  
497 *now if we are very much interested in those data, we can go, collect all their data and*  
498 *categories for our use...They don't have a ready data.” #9, Environmentalist*

499

500 Third, participants also perceived private medical colleges and healthcare facilities as  
501 reluctant to share data with the government, with a felt need to enhance governmental  
502 efforts to work on the state wide database. Fourth, on a related note, concerns about data  
503 quality were mentioned by several participants. Part of the reason for an unwillingness to  
504 share data by healthcare facilities was thought to be due to potentially inaccurate or poor  
505 quality data.

506

507 *“They're all afraid of like somebody will find a fault with that. So because they don't have*  
508 *manpower to look at the accurate or clean the data, okay, so somebody shares and later*  
509 *they find their mistake, and they will be answerable to the higher authority. So that's the*  
510 *usual reason we do not to share the data, the insecurity.” #3, Medical doctor/academic*

511 Another challenge shared was the slow, ongoing effort to digitalize the data. Participants  
512 described as feeling unmotivated to start research at the cost of manually sorting through  
513 thousands of paper records, unless there was a way to guarantee research output. This was  
514 also relate to a challenge of medical professionals being overburdened with work.

515 *“There is not even a digitalization...Many hospital doesn't have digitalized MRD [medical*  
516 *records department]. For example, I was doing a study, retrospective study, collecting*  
517 *infective endocarditis data for past 10 years, there are more than 1000 files. How can I go*  
518 *through the 1000 files? It's not possible.” #13, Practicing physician*

519 Surveillance of diseases was mentioned as ongoing work. Diabetes, hypertension, cervical  
520 cancer and other ‘notifiable’ diseases like infectious diseases were described as being under  
521 surveillance.

522

## 523 **DISCUSSION**

524 This research examined mainly barriers faced in conducting climate change and health  
525 research. While we focused on Puducherry, the findings relatively remain relevant for India  
526 and can be extrapolated to other LMIC settings [33].

527 In recent years, there have been a lot of strides taken in the Indian policy space with  
528 pertaining to climate change and health, such as the addition of the Health Pillar to the  
529 NAPCC and the subsequent development of the NAPCCHH and mandates for the  
530 development of the State level action plans for climate change and health [17, 18]. Although  
531 the Health Pillar is a relatively recent addition (2015), we still found a substantial lack of  
532 awareness on the NAPCC as well as the health mission in general, which we present as a key  
533 area for strengthening. Knowledge of such policies, especially if they can provide a  
534 framework to support related research, is a useful tool to advance the research agenda on  
535 climate change and health [34, 35] . Health system vulnerabilities are already being seen in  
536 Puducherry and active knowledge of such policies can also be utilized by relevant  
537 stakeholders to develop resilience focused interventions. This includes communicating the  
538 severity of the problem to the policy makers, who generally lack the political will to divert  
539 resources to non-apparent problems, alluded to by the participants in this study [36, 37].

540 Most political efforts are thought to be focused on mitigation measures such as air pollution  
541 control, with little importance given to health adaptation and healthcare resilience. The  
542 participants believed that the health impacts of climate change were not a political priority  
543 or seen as urgent. Similar findings have been elucidated in other studies which also found  
544 public health leadership on climate change to be fragmented [25, 38]. Further efforts to  
545 inform the decision makers on the importance of health adaptation might contribute to  
546 more evidence informed climate change and health policies [39, 40]. As an added  
547 justification for health co-benefits of mitigation can be introduced through multiple  
548 pathways, including air pollution, lifestyle modification, health surveillance or research  
549 programs in development or related policies [41, 42].

550 We found almost unanimous support for a separate inter-sectoral body focused specifically  
551 on climate change and health. Methodological challenges in the light of limited technical  
552 knowledge and adequate inter-sectorial coordination and support for transdisciplinary  
553 capacity that we found have also been reported elsewhere [43, 44]. A recent study on the  
554 knowledge, attitudes and practices related to climate change and health among the Indian  
555 health workforce found intermediate or delayed health impacts of climate change less  
556 commonly identified [26]. This could also support the development of regional, national or  
557 even international research networks facilitating knowledge sharing and transfer, including  
558 research methodology support [44].

559 The compartmentalization of work within institutes or sectors was seen as a research  
560 barrier, partially due to the unclear division of responsibilities and fragmented institutional  
561 focus, as also seen in other studies [38, 44, 45]. A study examining the challenges for the  
562 Californian public health sector in climate change found the compartmentalization and lack  
563 of inter-sectorial coordination to limit work on inter-sectoral issues such as climate change  
564 and health [25]. These findings point to the need to have regular national level conferences  
565 or improved science dissemination systems to communicate climate adaptation related  
566 research or plans between and across sectors.

567 Our respondents had varied views regarding education on climate change or its health  
568 impacts; however, the need to improve this was clearly described. The need for  
569 strengthening capacity and education has been a common finding in several other global  
570 studies. Globally, there is a critical gap and scope for improvement in the education on  
571 health impacts of climate change, especially for medical practitioners [25, 46-54]. A study  
572 comparing medical curriculums across the world found inconsistencies between  
573 environmental changes, health and community needs, with Indian and Chinese students  
574 especially having a gap in the inclusion of planetary health in medical schools [50]. The  
575 inclusion of planetary health from an early stage for medical students leads to a more active  
576 role of physicians in educating their patients about climate risks [50, 55]. However, there is a  
577 need to validate the results in future studies given the inconsistencies in the views we found  
578 on climate change-health education. The emphasis on cure rather than prevention, which  
579 has also been shown to reduce long term healthcare costs, implying a need for Puducherry  
580 to focus on the preventative aspects, largely through education and awareness [24]. As also  
581 found in our study, these health impacts are viewed as 'invisible' compared to more

582 conventional or immediate impacts, such as air pollution or extreme events [56]. This is also  
583 a commonly identified challenge to climate change and health research, accompanied by  
584 insufficient education about climate systems during the course of school or university  
585 education [26, 56].

586 Data barriers remain common challenges in public health research, despite efforts to  
587 facilitate improvements [57, 58]. As Puducherry has the advantage of a relatively small size  
588 and well-connected healthcare facilities, efforts need to be taken to improve a central,  
589 disease specific data collection system, incorporating all the healthcare facilities in the State  
590 [59]. Facilitating training to build local data analysis expertise would contribute to more  
591 region specific research on the topic [60]. As was also made apparent during the interviews,  
592 health impacts of climate change are a relatively new concept and not inherently associated  
593 with climate, potentially explaining the uncertainties and scepticism expressed, especially  
594 for diseases that do not warrant a visit to the doctor [61, 62]. On the positive side, the  
595 expressed desire of participants to learn more about it and make changes to the healthcare  
596 system and policies based on robust, conclusive evidence implies a willingness to adapt and  
597 implement changes in how the region tackles health impacts of climate change [49, 63].  
598 Resource and funding constraints are one of the most common barriers to public health  
599 research, especially in LMICs and there remains a critical need to address this gap [64].

600 At present, little is known on CVD impacts of climate change in India. Our related study from  
601 Puducherry found a high attributable burden of non-optimal temperature to CVD mortality,  
602 suggesting a need for similar studies from around the country [65, 66]. The CVD specific  
603 challenges we identified here are comparable to the general health challenges. Awareness  
604 among the medical community on the environmental risk factors of CVDs will be  
605 instrumental in furthering this research agenda, while awareness among policy makers will  
606 help raise the political prioritization of CVD impacts of climate change [24, 67, 68].

### 607 **Limitations**

608 This study had a few limitations. First, the sample was restricted to Puducherry district and  
609 not representative of the entire Union Territory of Puducherry, much less India as a whole,  
610 although the projected population for Puducherry is 1.25 million in 2021, comparable to a  
611 few smaller countries or global regions [69]. The results might thus only reflect the studied  
612 context and participants. Secondly, while we chose to focus on the medical community and  
613 DSTE representatives working on climate change, we could not include the experiences and  
614 perspectives of other public health professionals or stakeholders. Third, we do not highlight  
615 the opportunities for increasing research on climate change and health as many of these are  
616 very often interconnected with barriers. However, we do discuss potential  
617 recommendations given by stakeholders. Finally, our sample size was also limited by the  
618 ongoing COVID-19 measures. Nonetheless, the results of this study could be useful for the  
619 research community and policy makers alike to strengthen climate change and health  
620 research and engagement.

### 621 **Conclusion**

622 There is a great need to fill the gap in research on the impacts of climate change on various  
623 health outcomes in India, especially in light of the vulnerabilities it faces. By highlighting



624 some crucial barriers to environmental health research faced by relevant professionals, we  
625 present potential intervention points for consideration. Insufficient awareness on health  
626 impacts of climate change and perceived need to improve research capacity through  
627 collaborative work; and challenges in data availability emerged as the largest barriers to  
628 conducting research on this topic in Puducherry. We outlined the gaps and scope for  
629 addressing these through improved policy awareness; informed leadership and evidence  
630 informed climate change and health policies; research capacity strengthening and  
631 transdisciplinary research and communication network; improved education on climate  
632 change and health on all levels; and addressing data barriers in climate change through  
633 improved monitoring and evaluation systems. The key findings could contribute to  
634 supporting and strengthening evidence-informed climate resilient healthcare systems. In  
635 addition, it would also serve to inform and strengthen the research and institutional support  
636 for environmental health research in the future both in India and globally.

637

### 638 **Figure legends**

639 *Figure 1:* A framework for health adaptation action in the context of climate change based on level  
640 of knowledge, perceived health risks, policy and institutional support and public engagement. The  
641 circled part highlights the thematic areas we focus on in this work, namely institutional determinants  
642 and its challenges.

### 643 **DECLARATIONS**

#### 644 **Competing interests**

645 The authors declare that they have no competing interests.

#### 646 **Author contributions**

647 S.S, M.R, M.A.D, J.U and G.C conceptualized and planned the study. S.S and R.L acquired and  
648 provided access to the data. R.L facilitated the interviews. S.M and S.S designed the study.  
649 T.L validated the codes and codebook. O.C, S.S and S.M conceptualized and structured the  
650 framework. S.S wrote the main manuscript with inputs from all authors. The final  
651 manuscript has been revised by all authors.

#### 652 **Informed consent**

653 This study was approved by the Institute Ethics Committee (Human Studies) of the Indira  
654 Gandhi Medical College and Research Institute (A Government of Puducherry Institution);  
655 No. 318/IEC-31/IGM&RI/PP/2021 and by the Ethics Committee Northwest and Central  
656 Switzerland (EKNZ); Statement ID- AO\_2020\_00034. The methodology used in this project  
657 abided by the principles laid out in the Declaration of Helsinki and the COREQ checklist.

658 All participants were verbally explained the project and its objectives as well as being  
659 provided information sheets. All participants were made aware of their right to refuse  
660 participation at any point prior to publication of the study. Signed informed consent was  
661 obtained from all participants prior to the interviews, with participants retaining one copy.

#### 662 **Acknowledgements**

663 The authors would like to extend their sincere gratitude to all the participants who made this study  
664 possible.

## 665 Funding sources

666 S.S has received funding from the European Union's Horizon 2020 research and innovation  
667 programme under the Marie Skłodowska-Curie grant agreement No 801076, through the  
668 SSPH+ Global PhD Fellowship Programme in Public Health Sciences (GlobalP3HS) of the  
669 Swiss School of Public Health and from the Joint South Africa and Swiss Chair in Global  
670 Environmental Health.

671 O.C has been funded by the Swiss Government Excellence Scholarship (ESKAS) Id. 2020  
672 0742.

## 673 Data availability statement

674 All relevant data from this study has been included in the Supplementary material. As this is  
675 a qualitative study with a small number of key informants, making the full dataset and  
676 interview transcripts available to a wider audience could potentially breach the  
677 confidentiality commitment made to the participants during the process of obtaining  
678 informed consent as well as to the ethics committees that approved this study. Therefore,  
679 this data will not be made available.

680

## 681 References

- 682 1. Rocque, R.J., et al., *Health effects of climate change: an overview of systematic reviews*. BMJ  
683 open, 2021. **11**(6): p. e046333.
- 684 2. Cissé, G., R. McLeman, H. Adams, P. Aldunce, K. Bowen, D. Campbell-Lendrum, S. Clayton,  
685 K.L. Ebi, J. Hess, C. Huang, Q. Liu, G. McGregor, J. Semenza, and M.C. Tirado, *Health,*  
686 *Wellbeing, and the Changing Structure of Communities, in Climate Change 2022:*  
687 *Impacts, Adaptation and Vulnerability. Contribution of Working Group II to the Sixth*  
688 *Assessment Report of the Intergovernmental Panel on Climate Change* D.C.R. H-O. Pörtner,  
689 M. Tignor, E.S. Poloczanska, K. Mintenbeck, A. Alegría, M. Craig, S. Langsdorf, S. Löschke, V.  
690 Möller, A. Okem, B. Rama, Editor. 2022, IPCC: Cambridge, UK and New York, NY, USA. p.  
691 1041-1170.
- 692 3. WHO. *Climate change and health*. Fact sheets 2021; Available from:  
693 <https://www.who.int/news-room/fact-sheets/detail/climate-change-and-health>.
- 694 4. Patz, J.A., et al., *Impact of regional climate change on human health*. Nature, 2005.  
695 **438**(7066): p. 310-7.
- 696 5. Watts, N., et al., *The 2020 report of the Lancet Countdown on health and climate change:*  
697 *responding to converging crises*. Lancet, 2021. **397**(10269): p. 129-170.
- 698 6. Cisse, G., *Food-borne and water-borne diseases under climate change in low- and middle-*  
699 *income countries: Further efforts needed for reducing environmental health exposure risks*.  
700 Acta Trop, 2019. **194**: p. 181-188.
- 701 7. Rocha, J., et al., *Climate change and its impacts on health, environment and economy, in One*  
702 *Health*. 2022, Elsevier. p. 253-279.
- 703 8. Wise, R.M., et al., *Reconceptualising adaptation to climate change as part of pathways of*  
704 *change and response*. Global environmental change, 2014. **28**: p. 325-336.
- 705 9. Haines, A., et al., *Health risks of climate change: act now or pay later*. Lancet, 2014.  
706 **384**(9948): p. 1073-5.
- 707 10. Kjellstrom, T., *Climate change, direct heat exposure, health and well-being in low and*  
708 *middle-income countries*. Glob Health Action, 2009. **2**.

- 709 11. Scheelbeek, P.F.D., et al., *The effects on public health of climate change adaptation*  
710 *responses: a systematic review of evidence from low- and middle-income countries*. Environ  
711 Res Lett, 2021. **16**(7): p. 073001.
- 712 12. Ebi, K.L., R.S. Kovats, and B. Menne, *An approach for assessing human health vulnerability*  
713 *and public health interventions to adapt to climate change*. Environmental health  
714 perspectives, 2006. **114**(12): p. 1930-1934.
- 715 13. Gioli, G., T. Khan, and J. Scheffran, *Climatic and environmental change in the Karakoram:*  
716 *making sense of community perceptions and adaptation strategies*. Regional Environmental  
717 Change, 2014. **14**(3): p. 1151-1162.
- 718 14. Tripathi, V., R. Akhtar, and G.S. Preetha, *Perceptions Regarding Climate Change and its*  
719 *Health Impact: Reflections from a Community-Based Study in India*. Indian Journal of  
720 Community Medicine, 2021. **46**(2): p. 206-209.
- 721 15. Nayak, S., Takemi, T, *Assessing the Impact of Climate Change on Temperature and*  
722 *Precipitation Over India.*, in *Wadi Flash Floods. Natural Disaster Science and Mitigation*  
723 *Engineering: DPRI reports.*, T. Sumi, Kantoush, S.A., Saber, M. , Editor. 2022: Singapore.
- 724 16. Dagdeviren, H., A. Elangovan, and R. Parimalavalli, *Climate change, monsoon failures and*  
725 *inequality of impacts in South India*. Journal of Environmental Management, 2021. **299**.
- 726 17. GOI, *National Action Plan for Climate Change and Human Health*, G.o.I. Ministry of Health  
727 and Family Welfare, Editor. 2018.
- 728 18. GOI, G.o.I., *India's National Action Plan on Climate Change*. 2009.
- 729 19. Bush, K.F., et al., *Impacts of climate change on public health in India: future research*  
730 *directions*. Environmental Health Perspectives, 2011. **119**(6): p. 765-770.
- 731 20. Singh, P.K. and R.C. Dhiman, *Climate change and human health: Indian context*. Journal of  
732 vector borne diseases, 2012. **49**(2): p. 55.
- 733 21. Gill, M. and R. Stott, *Health professionals must act to tackle climate change*. Lancet, 2009.  
734 **374**(9706): p. 1953-1955.
- 735 22. Roberts, I., R. Stott, and C.H. Council, *Doctors and climate change*. British Medical Journal,  
736 2010. **341**.
- 737 23. Moser, A.M., F.L. Stigler, and B. Haditsch, *Physicians' responsibility for planetary health*.  
738 Lancet Planetary Health, 2017. **1**(2): p. E56-E56.
- 739 24. Sainsbury, P., et al., *Climate change is a health issue: what can doctors do?* Internal Medicine  
740 Journal, 2019. **49**(8): p. 1044-1048.
- 741 25. Gould, S. and L. Rudolph, *Challenges and Opportunities for Advancing Work on Climate*  
742 *Change and Public Health*. Int J Environ Res Public Health, 2015. **12**(12): p. 15649-72.
- 743 26. Vishvaja Sambath, S.N., Punita Kumar, Pooja Kumar, Adithya Pradyumna, *Knowledge,*  
744 *attitudes and practices related to climate change and its health aspects among the*  
745 *healthcare workforce in India – A cross-sectional study*. The Journal of Climate Change and  
746 Health, 2022. **6**.
- 747 27. Shrikhande, S.S., et al., *Climate change and health?: Knowledge and perceptions among key*  
748 *stakeholders in Puducherry, India*. medRxiv, 2023: p. 2023.01.17.23284663.
- 749 28. GOI, *Census of India- Puducherry*. 2011, Government of India.
- 750 29. DTEE. *Puducherry Climate Change Cell*. Available from:  
751 [https://dste.py.gov.in/PCCC/PCCC\\_Projects.html](https://dste.py.gov.in/PCCC/PCCC_Projects.html).
- 752 30. Gale, N.K., et al., *Using the framework method for the analysis of qualitative data in multi-*  
753 *disciplinary health research*. BMC Medical Research Methodology, 2013. **13**.
- 754 31. van Eck, C.W., B.C. Mulder, and S. van der Linden, *Climate Change Risk Perceptions of*  
755 *Audiences in the Climate Change Blogosphere*. Sustainability, 2020. **12**(19).
- 756 32. Rudolph, L. and S. Gould, *Climate Change and Health Inequities: A Framework for Action*.  
757 Ann Glob Health, 2015. **81**(3): p. 432-44.

- 758 33. Mallen, E., et al., *Overcoming Barriers to Successful Climate and Health Adaptation Practice: Notes from the Field*. International Journal of Environmental Research and Public Health, 2022. **19**(12): p. 7169.
- 759
- 760
- 761 34. Crouzat, E., et al., *Researchers must be aware of their roles at the interface of ecosystem services science and policy*. *Ambio*, 2018. **47**(1): p. 97-105.
- 762
- 763 35. van Valkengoed, A.M., G. Perlaviciute, and L. Steg, *Relationships between climate change perceptions and climate adaptation actions: policy support, information seeking, and behaviour*. *Climatic Change*, 2022. **171**(1-2).
- 764
- 765
- 766 36. Hussey, L.K. and G. Arku, *Conceptualizations of climate-related health risks among health experts and the public in Ghana*. *Social Science & Medicine*, 2019. **223**: p. 40-50.
- 767
- 768 37. Austin, S.E., et al., *Enabling local public health adaptation to climate change*. *Social Science & Medicine*, 2019. **220**: p. 236-244.
- 769
- 770 38. Robbert Biesbroek, J.K., Catrien Termeer, and Pavel Kabat, *Barriers to climate change adaptation in the Netherlands*. *Climate Law*, 2011. **2**(2): p. 181-199.
- 771
- 772 39. Oxman, A.D., et al., *SUPPORT Tools for evidence-informed health Policymaking (STP) 15: Engaging the public in evidence-informed policymaking*. *Health research policy and systems*, 2009. **7**(1): p. 1-9.
- 773
- 774
- 775 40. Uzochukwu, B., et al., *The challenge of bridging the gap between researchers and policy makers: experiences of a Health Policy Research Group in engaging policy makers to support evidence informed policy making in Nigeria*. *Globalization and health*, 2016. **12**(1): p. 1-15.
- 776
- 777
- 778 41. Haines, A., *Health co-benefits of climate action*. *Lancet Planet Health*, 2017. **1**(1): p. e4-e5.
- 779 42. Haines, A., et al., *Public health benefits of strategies to reduce greenhouse-gas emissions: overview and implications for policy makers*. *Lancet*, 2009. **374**(9707): p. 2104-2114.
- 780
- 781 43. Xun, W.W., et al., *Climate change epidemiology: methodological challenges*. *International Journal of Public Health*, 2010. **55**(2): p. 85-96.
- 782
- 783 44. Leal Filho, W., et al., *Implementing climate change research at universities: Barriers, potential and actions*. *Journal of Cleaner Production*, 2018. **170**: p. 269-277.
- 784
- 785 45. Eisenack, K., et al., *Explaining and overcoming barriers to climate change adaptation*. *Nature Climate Change*, 2014. **4**(10): p. 867-872.
- 786
- 787 46. Yang, L., et al., *Associations between Knowledge of the Causes and Perceived Impacts of Climate Change: A Cross-Sectional Survey of Medical, Public Health and Nursing Students in Universities in China*. *Int J Environ Res Public Health*, 2018. **15**(12).
- 788
- 789 47. Hathaway, J. and E.W. Maibach, *Health Implications of Climate Change: a Review of the Literature About the Perception of the Public and Health Professionals*. *Curr Environ Health Rep*, 2018. **5**(1): p. 197-204.
- 790
- 791
- 792 48. Kotcher, J., et al., *Views of health professionals on climate change and health: a multinational survey study*. *Lancet Planet Health*, 2021. **5**(5): p. e316-e323.
- 793
- 794
- 795 49. Corner, A., *PSYCHOLOGY Science literacy and climate views*. *Nature Climate Change*, 2012. **2**(10): p. 710-711.
- 796
- 797 50. Omrani, O.E., et al., *Envisioning planetary health in every medical curriculum: An international medical student organization's perspective*. *Med Teach*, 2020. **42**(10): p. 1107-1111.
- 798
- 799
- 800 51. Whitley, C.T., et al., *Sustainability behaviors among college students: an application of the VBN theory*. *Environmental Education Research*, 2018. **24**(2): p. 245-262.
- 801
- 802 52. Chaplin, G. and P. Wyton, *Student engagement with sustainability: understanding the value-action gap*. *International Journal of Sustainability in Higher Education*, 2014. **15**(4): p. 404-417.
- 803
- 804
- 805 53. Andersen, J.G., et al., *Perspectives of Local Community Leaders, Health Care Workers, Volunteers, Policy Makers and Academia on Climate Change Related Health Risks in Mukuru Informal Settlement in Nairobi, Kenya-A Qualitative Study*. *International Journal of Environmental Research and Public Health*, 2021. **18**(22).
- 806
- 807
- 808

- 809 54. Eagle, L., et al., *Attitudes of undergraduate business students toward sustainability issues*.  
810 International Journal of Sustainability in Higher Education, 2015. **16**(5): p. 650-668.
- 811 55. Shaman, J. and K. Knowlton, *The Need for Climate and Health Education*. Am J Public Health,  
812 2018. **108**(S2): p. S66-S67.
- 813 56. McMichael, A.J., *Impediments to comprehensive research on climate change and health*. Int J  
814 Environ Res Public Health, 2013. **10**(11): p. 6096-105.
- 815 57. van Panhuis, W.G., et al., *A systematic review of barriers to data sharing in public health*.  
816 BMC Public Health, 2014. **14**.
- 817 58. Lazem, M. and A. Sheikhtaheri, *Barriers and facilitators for disease registry systems: a mixed-  
818 method study*. BMC Medical Informatics and Decision Making, 2022. **22**(1).
- 819 59. Lakshmanasamy Ravivarman, P.K. *A10 Medically certified causes of death and risk factors in  
820 mortality, Puducherry district, India, 2016-19*. 2020. BMC Proc 15 (Suppl 11).
- 821 60. Levison, M.M., et al., *Development of a Climate Change Vulnerability Assessment Using a  
822 Public Health Lens to Determine Local Health Vulnerabilities: An Ontario Health Unit  
823 Experience*. International Journal of Environmental Research and Public Health, 2018. **15**(10).
- 824 61. Valois, P., et al., *The Health Impacts of Climate Change: A Continuing Medical Education  
825 Needs Assessment Framework*. J Contin Educ Health Prof, 2016. **36**(3): p. 218-25.
- 826 62. Herrmann, A. and R. Sauerborn, *General Practitioners' Perceptions of Heat Health Impacts on  
827 the Elderly in the Face of Climate Change A Qualitative Study in Baden-Wuerttemberg,  
828 Germany*. International Journal of Environmental Research and Public Health, 2018. **15**(5).
- 829 63. Paterson, J., et al., *Health Care Facilities Resilient to Climate Change Impacts*. International  
830 Journal of Environmental Research and Public Health, 2014. **11**(12): p. 13097-13116.
- 831 64. Shumba CS, L.A., *Not enough traction: Barriers that aspiring researchers from low- and  
832 middle-income countries face in global health research*. Journal of Global Health Economics  
833 and Policy, 2021. **1**.
- 834 65. Shrikhande, S., Pedder, H., Roosli, M., Dalvie, MA., Lakshmanasamy. R., Gasparri, A.,  
835 Utzinger, J., Cisse. G, *Non-optimal apparent temperature and cardiovascular mortality: the  
836 association in Puducherry, India between 2010 and 2020*. Research Square 2022.
- 837 66. Bhatia, M., et al., *Impending epidemic of cardiovascular diseases among lower  
838 socioeconomic groups in India*. The Lancet Healthy Longevity, 2021. **2**(6): p. e314-e315.
- 839 67. Sheffield, P.E., et al., *Emerging Roles of Health Care Providers to Mitigate Climate Change  
840 Impacts: A Perspective from East Harlem, New York*. Health and Human Rights, 2014. **16**(1):  
841 p. 113-121.
- 842 68. Dupraz, J. and B. Burnand, *Role of Health Professionals Regarding the Impact of Climate  
843 Change on Health-An Exploratory Review*. International Journal of Environmental Research  
844 and Public Health, 2021. **18**(6).
- 845 69. GovernmentOfPuducherry. *About Puducherry District*. 2022 [25/03/2022]; Available from:  
846 <https://puducherry-dt.gov.in/history/>.

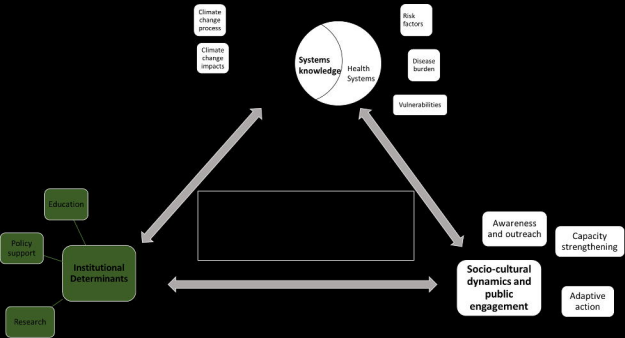

Source: https://medrxiv.org/content/10.1101/2023.01.26.23284955.full.pdf
